# Supplementary material for: HIV-1 capsid stability enables inositol phosphate-independent infection of target cells and promotes integration into genes
Source: PLoS Pathog. 2023 Jun 2;19(6):e1011423. doi: 10.1371/journal.ppat.1011423 (PMC10266667; doi:10.1371/journal.ppat.1011423)
Supplement: S2 Table — Number of unique integrations for each library. (XLSX) [file ppat.1011423.s007.xlsx]

## Sheet: Table S2
Table S2: Summaries for each integration site sequencing library
Sample Name	CEM cell line/ HIV-1 CA	Unique integrations	# in genes	# +/- 2.5 kb TSS	# +/- 2.5 kb CpG	# +/- 2.5 kb LAD	# in LAD	# in SPAD	# +/- 2.5 kb SPAD	Genes/Mb	% in genes	% +/- 2.5 kb TSS	% +/- 2.5 kb CpG	% +/- 2.5 kb LAD	% in LAD	% in SPAD	% +/- 2.5 kb SPAD	Single condition (Total sites)	Total sites sequenced	# of libraries	# of conditions	# of CA mutants
6884-GS-2	WT/ HIV-1-GFP CA WTVSVg	2429	2033	119	181	492	23	488	1236	22.28	0.83697	0.0489914	0.0745163	0.202552	0.00946892	0.200906	0.508851	181112	1250042	122	34	20
7076-GS-2	WT/ HIV-1-GFP CA WTVSVg	10890	9363	525	792	1873	71	2467	5968	23.8318	0.85978	0.0482094	0.0727273	0.171993	0.00651974	0.226538	0.548026
7256-GS-4	WT/ HIV-1-GFP CA WTVSVg	21877	18176	1068	1550	4248	204	4628	11279	22.5765	0.830827	0.0488184	0.0708507	0.194177	0.00932486	0.211546	0.515564
7399-GS-1	WT/ HIV-1-GFP CA WTVSVg	20090	16346	1006	1488	4345	177	3956	9863	21.6169	0.813639	0.0500747	0.0740667	0.216277	0.00881035	0.196914	0.490941
7399-GS-8	WT/ HIV-1-GFP CA WTVSVg	19135	15898	958	1410	3873	173	4076	9844	22.5394	0.830834	0.0500653	0.073687	0.202404	0.00904102	0.213013	0.51445
7399-GS-14	WT/ HIV-1-GFP CA WTVSVg	19706	16034	983	1499	4155	179	4009	9864	21.8517	0.813661	0.0498833	0.0760682	0.210849	0.00908353	0.203441	0.500558
7399-GS-18	WT/ HIV-1-GFP CA WTVSVg	6671	5594	330	528	1225	54	1497	3619	23.4002	0.838555	0.0494678	0.0791486	0.183631	0.00809474	0.224404	0.542497
7442-GS-1	WT/ HIV-1-GFP CA WTVSVg	15511	12963	789	1216	2918	127	3470	8228	23.6813	0.835729	0.0508671	0.078396	0.188125	0.00818774	0.223712	0.530462
7442-GS-4	WT/ HIV-1-GFP CA WTVSVg	14435	12069	683	1069	2714	93	3045	7641	23.2161	0.836093	0.0473156	0.0740561	0.188015	0.00644267	0.210946	0.529338
7442-GS-8	WT/ HIV-1-GFP CA WTVSVg	17077	14224	807	1261	3258	125	3765	8961	22.7358	0.832933	0.0472565	0.073842	0.190783	0.00731979	0.220472	0.524741
8806-GS-1	WT/ HIV-1-GFP CA WTVSVg	11559	9787	536	860	2153	89	2551	6209	23.6962	0.8467	0.0463708	0.0744009	0.186262	0.00769963	0.220694	0.537157
8806-GS-2	WT/ HIV-1-GFP CA WTVSVg	8122	6773	405	638	1561	86	1824	4282	23.4211	0.833908	0.0498646	0.0785521	0.192194	0.0105885	0.224575	0.52721
8806-GS-3	WT/ HIV-1-GFP CA WTVSVg	13610	11206	630	984	2702	110	3031	7074	23.0741	0.823365	0.0462895	0.0722998	0.19853	0.00808229	0.222704	0.519765
8806-GS-4	WT/ HIV-GFP-CA P38AVSVg	5387	4402	258	393	1119	40	1147	2765	22.7167	0.817152	0.0478931	0.0729534	0.207722	0.00742528	0.21292	0.513273	18734
8806-GS-5	WT/ HIV-GFP-CA P38AVSVg	7393	6211	332	501	1591	59	1461	3559	21.7331	0.840119	0.0449073	0.0677668	0.215204	0.00798052	0.197619	0.481401
8806-GS-6	WT/ HIV-GFP-CA P38AVSVg	5954	4897	272	381	1247	61	1203	2862	22.003	0.822472	0.0456836	0.0639906	0.209439	0.0102452	0.202049	0.480685
8806-GS-10	WT/ HIV-GFP-CA P38A/T200IVSVg	4507	3769	210	295	901	44	918	2242	22.2336	0.836255	0.0465942	0.0654537	0.199911	0.00976259	0.203683	0.497448	36011
8806-GS-11	WT/ HIV-GFP-CA P38A/T200IVSVg	10440	8659	418	651	2157	105	2170	5197	22.251	0.829406	0.0400383	0.0623563	0.206609	0.0100575	0.207854	0.497797
8806-GS-12	WT/ HIV-GFP-CA P38A/T200IVSVg	6205	5012	274	405	1309	64	1259	3103	22.0477	0.807736	0.0441579	0.0652699	0.210959	0.0103143	0.202901	0.500081
9035-GS-18	WT/ HIV-GFP-CA P38A/T200IVSVg	5195	4265	172	263	1066	40	921	2444	21.2152	0.820982	0.0331088	0.0506256	0.205197	0.00769971	0.177286	0.470452
9035-GS-19	WT/ HIV-GFP-CA P38A/T200IVSVg	3415	2625	162	204	750	31	620	1593	20.3458	0.768668	0.0474378	0.0597365	0.219619	0.0090776	0.181552	0.466471
9035-GS-20	WT/ HIV-GFP-CA P38A/T200IVSVg	6249	5104	277	364	1216	55	1162	3070	21.5204	0.816771	0.0443271	0.0582493	0.194591	0.00880141	0.18595	0.491279
7076-GS-4	WT/ HIV-1-GFP CA P38A/T216IVSVg	45443	37306	2039	2955	9464	415	8954	22135	21.5515	0.820941	0.0448694	0.0650265	0.208261	0.00913232	0.197038	0.487094	134818
6884-GS-4	WT/ HIV-1-GFP CA P38A/T216IVSVg	3447	2753	178	260	758	40	689	1656	21.7554	0.798666	0.0516391	0.0754279	0.219901	0.0116043	0.199884	0.480418
7399-GS-9	WT/ HIV-1-GFP CA P38A/T216IVSVg	54720	42850	2562	3771	12960	579	10040	24802	20.3243	0.783077	0.0468202	0.0689145	0.236842	0.0105811	0.18348	0.453253
7399-GS-20	WT/ HIV-1-GFP CA P38A/T216IVSVg	31208	25365	1521	2234	6607	276	6136	15170	21.5537	0.812772	0.0487375	0.0715842	0.211709	0.00884389	0.196616	0.486093
7256-GS-11	WT/ HIV-1-GFP-CA-E45AVSVg	36143	24966	1251	1370	13521	578	2166	8074	12.234	0.690756	0.0346125	0.037905	0.374097	0.015992	0.0599286	0.22339	62383
7399-GS-10	WT/ HIV-1-GFP-CA-E45AVSVg	9611	7210	298	317	3274	145	641	2323	12.9858	0.750182	0.0310061	0.032983	0.340651	0.0150869	0.0666944	0.241702
7076-GS-5	WT/ HIV-1-GFP-CA-E45AVSVg	16629	12876	508	510	5478	222	1318	4497	14.007	0.77431	0.030549	0.0306693	0.329424	0.0133502	0.0792591	0.270431
7256-GS-12	WT/ HIV-1-GFP-CA-E45A/R132TVSVg	18922	15236	609	744	6117	255	2129	5895	16.0425	0.8052	0.0321848	0.0393193	0.323274	0.0134764	0.112515	0.311542	86907
7076-GS-6	WT/ HIV-1-GFP-CA-E45A/R132TVSVg	41970	33305	1663	2099	11970	535	5901	15899	17.8179	0.793543	0.0396235	0.0500119	0.285204	0.0127472	0.1406	0.378818
7399-GS-11	WT/ HIV-1-GFP-CA-E45A/R132TVSVg	26015	21443	955	1235	7851	298	3361	9008	17.1208	0.824255	0.0367096	0.0474726	0.301787	0.0114549	0.129195	0.346262
7845-GS-1	WT/ HIV-GFP-CA E75AVSVg	7622	6083	325	392	1767	82	1150	3187	19.2131	0.798084	0.0426397	0.0514301	0.231829	0.0107583	0.150879	0.418132	24327
7845-GS-7	WT/ HIV-GFP-CA E75AVSVg	10045	7997	434	573	2482	101	1499	4227	18.8903	0.796117	0.0432056	0.0570433	0.247088	0.0100548	0.149228	0.420806
7845-GS-12	WT/ HIV-GFP-CA E75AVSVg	6660	5218	285	386	1705	70	1068	2812	19.3327	0.783483	0.0427928	0.057958	0.256006	0.0105105	0.16036	0.422222
7256-GS-6	WT/ HIV-1-GFP CA N74DVSVg	18878	12697	429	365	10655	481	308	1439	8.18921	0.672582	0.0227249	0.0193347	0.564414	0.0254794	0.0163153	0.0762263	48021
7399-GS-6	WT/ HIV-1-GFP CA N74DVSVg	19312	12632	541	474	10436	444	412	1898	8.60827	0.654101	0.0280137	0.0245443	0.540389	0.0229909	0.0213339	0.0982809
7442-GS-5	WT/ HIV-1-GFP CA N74DVSVg	9831	6534	233	207	5572	262	137	779	8.083	0.664632	0.0237005	0.0210558	0.566779	0.0266504	0.0139355	0.0792391
7256-GS-5	WT/ HIV-1-GFP CA N57AVSVg	1808	1227	76	87	526	24	162	548	14.1289	0.67865	0.0420354	0.0481195	0.290929	0.0132743	0.0896018	0.303097	8693
7845-GS-5	WT/ HIV-1-GFP CA N57AVSVg	3174	2229	124	128	1198	50	157	676	11.8239	0.702268	0.0390674	0.0403277	0.377442	0.015753	0.0494644	0.21298
7845-GS-11	WT/ HIV-1-GFP CA N57AVSVg	3711	2658	130	113	1386	64	205	762	11.7009	0.716249	0.035031	0.03045	0.373484	0.017246	0.0552412	0.205335
7256-GS-7	WT/ HIV-1-GFP CA G89VVSVg	6425	5039	265	351	1727	71	849	2405	17.7974	0.78428	0.0412451	0.0546304	0.268794	0.0110506	0.13214	0.374319	11981
7399-GS-4	WT/ HIV-1-GFP CA G89VVSVg	3497	2611	150	163	997	50	430	1217	16.5688	0.74664	0.0428939	0.0466114	0.285102	0.014298	0.122963	0.348013
7399-GS-7	WT/ HIV-1-GFP CA G89VVSVg	2059	1540	77	113	481	23	350	915	19.9514	0.747936	0.0373968	0.054881	0.233609	0.0111705	0.169985	0.44439
7256-GS-8	WT/ HIV-GFP-CA-CA Q63A/Q67AVSVg	7137	4679	244	271	3091	137	345	1281	10.7157	0.655598	0.034188	0.0379711	0.433095	0.0191957	0.0483396	0.179487	99926
7399-GS-3	WT/ HIV-GFP-CA-CA Q63A/Q67AVSVg	5332	3594	169	175	2210	95	272	987	10.937	0.674044	0.0316954	0.0328207	0.414479	0.017817	0.0510128	0.185109
8460-GS-1	WT/ HIV-GFP-CA-CA Q63A/Q67AVSVg	4985	3578	129	114	2315	116	150	723	9.94142	0.717753	0.0258776	0.0228686	0.464393	0.0232698	0.0300903	0.145035
8460-GS-2	WT/ HIV-GFP-CA-CA Q63A/Q67AVSVg	7321	5366	172	153	3203	122	285	1125	10.2691	0.73296	0.0234941	0.0208988	0.437509	0.0166644	0.0389291	0.153668
7076-GS-3	WT/ HIV-GFP-CA-CA Q63A/Q67AVSVg	29108	20550	777	671	13805	555	790	3772	9.6424	0.705991	0.0266937	0.0230521	0.474268	0.0190669	0.0271403	0.129586
7399-GS-2	WT/ HIV-GFP-CA-CA Q63A/Q67AVSVg	14021	10011	433	392	6140	273	493	2213	10.2329	0.714	0.0308822	0.0279581	0.437915	0.0194708	0.0351615	0.157835
7399-GS-19	WT/ HIV-GFP-CA-CA Q63A/Q67AVSVg	32022	22379	1010	947	14205	609	1159	5078	10.2835	0.698863	0.0315408	0.0295734	0.443601	0.0190182	0.0361939	0.158578
7256-GS-9	WT/ HIV-1-GFP CA E128A/R132AVSVg	6496	4924	196	275	2104	89	692	1993	15.6998	0.758005	0.0301724	0.0423337	0.323892	0.0137007	0.106527	0.306804	30152
7442-GS-2	WT/ HIV-1-GFP CA E128A/R132AVSVg	8083	6391	271	365	2803	122	866	2495	15.9127	0.790672	0.0335272	0.0451565	0.346777	0.0150934	0.107138	0.308673
8460-GS-3	WT/ HIV-1-GFP CA E128A/R132AVSVg	7880	6142	269	365	2343	100	1019	2793	17.542	0.779442	0.0341371	0.0463198	0.297335	0.0126904	0.129315	0.354442
8460-GS-4	WT/ HIV-1-GFP CA E128A/R132AVSVg	7693	5972	301	357	2300	101	934	2712	17.2124	0.77629	0.0391265	0.0464058	0.298973	0.0131288	0.121409	0.352528
7442-GS-9	WT/ HIV-GFP-CA-R167AVSVg	13714	11246	597	965	2733	105	2817	6948	22.1294	0.820038	0.0435322	0.070366	0.199285	0.00765641	0.205411	0.506636	28211
7845-GS-19	WT/ HIV-GFP-CA-R167AVSVg	5008	3878	276	440	988	44	1101	2613	22.7109	0.774361	0.0551118	0.0878594	0.197284	0.00878594	0.219848	0.521765
7845-GS-20	WT/ HIV-GFP-CA-R167AVSVg	9489	7743	442	710	1882	88	1997	4806	22.3519	0.815997	0.0465803	0.0748235	0.198335	0.0092739	0.210454	0.506481
7845-GS-2	WT/ HIV-GFP-CA K170AVSVg	259	156	9	12	66	2	28	88	15.7529	0.602317	0.034749	0.046332	0.254826	0.00772201	0.108108	0.339768	1092
7845-GS-6	WT/ HIV-GFP-CA K170AVSVg	454	251	22	31	119	6	48	166	16.0308	0.552863	0.0484581	0.0682819	0.262115	0.0132159	0.105727	0.365639
7845-GS-13	WT/ HIV-GFP-CA K170AVSVg	379	226	13	22	114	3	54	149	16.8786	0.596306	0.0343008	0.0580475	0.300792	0.00791557	0.14248	0.39314
9035-GS-1	WT/ HIV-GFP-CA K170A/T200IVSVg	4833	4083	212	319	911	36	984	2463	22.6007	0.844817	0.0438651	0.0660046	0.188496	0.00744879	0.2036	0.509621	12165
9035-GS-2	WT/ HIV-GFP-CA K170A/T200IVSVg	3700	3080	147	222	748	30	789	1869	22.4738	0.832432	0.0397297	0.06	0.202162	0.00810811	0.213243	0.505135
9035-GS-3	WT/ HIV-GFP-CA K170A/T200IVSVg	3632	3089	151	250	666	18	738	1885	22.5694	0.850496	0.0415749	0.0688326	0.18337	0.00495595	0.203194	0.518998
8806-GS-7	WT/ HIV-GFP-CA-T200IVSVg	7435	5813	296	421	1905	81	1285	3284	19.8966	0.781843	0.0398117	0.0566241	0.256221	0.0108944	0.172831	0.441695	17770
8806-GS-8	WT/ HIV-GFP-CA-T200IVSVg	8002	6226	372	476	2116	89	1272	3330	19.598	0.778055	0.0464884	0.0594851	0.264434	0.0111222	0.15896	0.416146
8806-GS-9	WT/ HIV-GFP-CA-T200IVSVg	2333	1860	97	130	533	29	381	1061	20.5324	0.797257	0.0415774	0.0557222	0.228461	0.0124303	0.163309	0.454779
7442-GS-10	WT/ HIV-GFP-CA-K203AVSVg	5318	4076	195	255	1451	48	702	2008	17.2994	0.766454	0.0366679	0.0479504	0.272847	0.00902595	0.132005	0.377586	15424
7845-GS-18	WT/ HIV-GFP-CA-K203AVSVg	4452	3385	184	246	1119	56	643	1804	18.7046	0.760332	0.0413297	0.0552561	0.251348	0.0125786	0.144429	0.405211
7845-GS-21	WT/ HIV-GFP-CA-K203AVSVg	5654	4453	222	285	1569	69	762	2124	17.6793	0.787584	0.0392642	0.0504068	0.277503	0.0122037	0.134772	0.375663
9035-GS-4	WT/ HIV-GFP-CA-K203A/T200IVSVg	5922	4805	255	387	1406	61	1048	2760	21.0419	0.811381	0.0430598	0.0653495	0.23742	0.0103006	0.176967	0.466059	15872
9035-GS-5	WT/ HIV-GFP-CA-K203A/T200IVSVg	5236	4302	205	307	1216	56	920	2349	20.4433	0.82162	0.039152	0.0586325	0.232238	0.0106952	0.175707	0.448625
9035-GS-6	WT/ HIV-GFP-CA-K203A/T200IVSVg	4714	3923	165	281	1034	50	882	2283	20.8668	0.832202	0.0350021	0.0596097	0.219347	0.0106067	0.187102	0.484302
7442-GS-11	WT/ HIV-GFP-CA-P207AVSVg	17468	14500	897	1413	3148	141	3935	9435	23.5996	0.830089	0.051351	0.0808908	0.180215	0.0080719	0.225269	0.540131	34027
7845-GS-17	WT/ HIV-GFP-CA-P207AVSVg	8869	7329	524	803	1581	76	2121	4909	24.0232	0.826361	0.0590822	0.0905401	0.178261	0.00856917	0.239148	0.553501
7845-GS-22	WT/ HIV-GFP-CA-P207AVSVg	7690	6451	379	582	1470	76	1766	4207	23.5948	0.838882	0.0492848	0.0756827	0.191157	0.00988296	0.229649	0.547074
7442-GS-3	WT/ HIV-GFP-CA-Q219AVSVg	15434	12883	703	1038	3237	140	2948	7468	21.6443	0.834716	0.0455488	0.0672541	0.209732	0.00907088	0.191007	0.483867	46038
7442-GS-6	WT/ HIV-GFP-CA-Q219AVSVg	10426	8590	507	769	2130	86	2183	5250	22.5054	0.823902	0.0486284	0.0737579	0.204297	0.00824861	0.20938	0.503549
7845-GS-10	WT/ HIV-GFP-CA-Q219AVSVg	8105	6742	346	436	1790	79	1327	3587	20.0175	0.831832	0.0426897	0.053794	0.220851	0.00974707	0.163726	0.442566
7845-GS-16	WT/ HIV-GFP-CA-Q219AVSVg	12073	10079	519	705	2507	94	2136	5691	20.9708	0.834838	0.0429885	0.0583948	0.207653	0.00778597	0.176924	0.471382
9035-GS-7	WT/ HIV-GFP-CA-T200I/Q219AVSVg	5961	4910	243	370	1288	49	1100	2785	20.9409	0.823687	0.040765	0.0620701	0.216071	0.0082201	0.184533	0.467203	19241
9035-GS-8	WT/ HIV-GFP-CA-T200I/Q219AVSVg	6712	5545	271	399	1532	70	1226	3121	21.0757	0.826132	0.0403754	0.0594458	0.228248	0.0104291	0.182658	0.464988
9035-GS-9	WT/ HIV-GFP-CA-T200I/Q219AVSVg	6568	5509	283	400	1403	68	1283	3231	21.5294	0.838764	0.0430877	0.0609013	0.213611	0.0103532	0.195341	0.491931
Sample Name	CEM cell line/ HIV-1 CA	Unique integrations	# in genes	# +/- 2.5 kb TSS	# +/- 2.5 kb CpG	# +/- 2.5 kb LAD	# in LAD	# in SPAD	# +/- 2.5 kb SPAD	Genes/Mb	% in genes	% +/- 2.5 kb TSS	% +/- 2.5 kb CpG	% +/- 2.5 kb LAD	% in LAD	% in SPAD	% +/- 2.5 kb SPAD	Single condition (Total sites)
7076-GS-10	IPPK KO/ HIV-1-GFP-CA WTVSVg	10467	8629	456	681	2449	113	2107	5049	21.5453	0.8244	0.0435655	0.0650616	0.233973	0.0107958	0.201299	0.482373	51516
6884-GS-8	IPPK KO/ HIV-1-GFP-CA WTVSVg	7731	6217	325	477	1858	75	1484	3659	21.5321	0.804165	0.0420385	0.0616997	0.240331	0.0097012	0.191954	0.473289
7399-GS-12	IPPK KO/ HIV-1-GFP-CA WTVSVg	15046	11627	633	934	3942	162	2810	6868	20.6923	0.772764	0.042071	0.0620763	0.261997	0.010767	0.186761	0.456467
7399-GS-15	IPPK KO/ HIV-1-GFP-CA WTVSVg	18272	14275	786	1136	4750	219	3202	8272	20.1758	0.78125	0.0430166	0.0621716	0.259961	0.0119856	0.175241	0.452715
9055-GS-0005	IPPK KO/ HIV-GFP-CA T200IVSVg	11424	8190	423	565	3625	152	1570	4255	17.4464	0.716912	0.0370273	0.0494573	0.317314	0.0133053	0.13743	0.372461	30872
9055-GS-0006	IPPK KO/ HIV-GFP-CA T200IVSVg	9090	6503	347	489	2819	112	1327	3406	17.5464	0.715402	0.0381738	0.0537954	0.310121	0.0123212	0.145985	0.374697
9055-GS-0007	IPPK KO/ HIV-GFP-CA T200IVSVg	10358	7450	378	509	3296	142	1459	3809	17.4845	0.719251	0.0364935	0.0491408	0.318208	0.0137092	0.140857	0.367735
9055-GS-0011	IPPK KO/ HIV-GFP-CA P38AVSVg	1463	951	65	86	466	24	173	530	16.7628	0.650034	0.0444293	0.0587833	0.318524	0.0164046	0.11825	0.362269	4527
9055-GS-0012	IPPK KO/ HIV-GFP-CA P38AVSVg	373	252	13	20	102	3	52	149	17.1555	0.675603	0.0348525	0.0536193	0.273458	0.0080429	0.13941	0.399464
9055-GS-0013	IPPK KO/ HIV-GFP-CA P38AVSVg	439	239	31	31	119	7	66	176	17.7745	0.544419	0.070615	0.070615	0.271071	0.0159453	0.150342	0.400911
9055-GS-0014	IPPK KO/ HIV-GFP-CA P38AVSVg	2252	1388	87	107	640	31	267	813	16.25	0.616341	0.0386323	0.0475133	0.284192	0.0137655	0.118561	0.361012
9055-GS-0015	IPPK KO/ HIV-GFP-CA P38A/T200IVSVg	16008	12448	648	884	4334	185	2626	6861	19.652	0.777611	0.0404798	0.0552224	0.27074	0.0115567	0.164043	0.428598	60033
9055-GS-0016	IPPK KO/ HIV-GFP-CA P38A/T200IVSVg	21779	16865	810	1147	5958	259	3541	9246	19.2034	0.77437	0.0371918	0.0526654	0.273566	0.0118922	0.162588	0.424537
9055-GS-0017	IPPK KO/ HIV-GFP-CA P38A/T200IVSVg	22246	17126	833	1129	6195	261	3538	9365	19.139	0.769846	0.0374449	0.0507507	0.278477	0.0117324	0.15904	0.420975
7845-GS-3	IPPK KO/ HIV-GFP-CA-Q219AVSVg	1659	1145	75	79	516	28	229	590	17.2803	0.690175	0.045208	0.047619	0.311031	0.0168776	0.138035	0.355636	8193
7845-GS-8	IPPK KO/ HIV-GFP-CA-Q219AVSVg	2419	1741	90	134	736	37	318	894	17.0773	0.719719	0.0372055	0.0553948	0.304258	0.0152956	0.131459	0.369574
7845-GS-15	IPPK KO/ HIV-GFP-CA-Q219AVSVg	4115	2993	175	189	1271	60	573	1460	17.0253	0.727339	0.0425273	0.0459295	0.30887	0.0145808	0.139247	0.3548
9055-GS-0008	IPPK KO/ HIV-GFP-CA-T200I/Q219AVSVg	20220	15579	714	1062	6170	252	3038	7869	18.3479	0.770475	0.0353116	0.0525223	0.305143	0.0124629	0.150247	0.389169	57769
9055-GS-0009	IPPK KO/ HIV-GFP-CA-T200I/Q219AVSVg	18602	14428	661	948	5639	209	2796	7117	17.9701	0.775616	0.0355338	0.0509623	0.303139	0.0112354	0.150306	0.382593
9055-GS-0010	IPPK KO/ HIV-GFP-CA-T200I/Q219AVSVg	18947	14270	677	907	5825	243	2827	7398	18.1236	0.753154	0.0357313	0.0478704	0.307437	0.0128252	0.149206	0.390458
Sample Name	CEM cell line/ HIV-1 CA	Unique integrations	# in genes	# +/- 2.5 kb TSS	# +/- 2.5 kb CpG	# +/- 2.5 kb LAD	# in LAD	# in SPAD	# +/- 2.5 kb SPAD	Genes/Mb	% in genes	% +/- 2.5 kb TSS	% +/- 2.5 kb CpG	% +/- 2.5 kb LAD	% in LAD	% in SPAD	% +/- 2.5 kb SPAD	Single condition (Total sites)
7076-GS-8	IPMK KO/ HIV-1-GFP-CA WTVSVg	20990	16836	791	1167	5406	231	3654	9243	20.0444	0.802096	0.0376846	0.0555979	0.257551	0.0110052	0.174083	0.440353	45313
6884-GS-6	IPMK KO/ HIV-1-GFP-CA WTVSVg	7352	5248	301	438	2087	90	1087	2891	18.2252	0.713819	0.0409412	0.0595756	0.283868	0.0122416	0.147851	0.393226
7399-GS-13	IPMK KO/ HIV-1-GFP-CA WTVSVg	6518	4957	239	349	1923	92	942	2523	18.4373	0.760509	0.0366677	0.053544	0.295029	0.0141148	0.144523	0.387082
7399-GS-16	IPMK KO/ HIV-1-GFP-CA WTVSVg	10453	7875	419	560	3251	154	1446	3868	17.7475	0.753372	0.0400842	0.0535731	0.311011	0.0147326	0.138333	0.370037
9035-GS-10	IPMK KO/ HIV-GFP-CA T200IVSVg	4093	2887	138	164	1546	69	416	1142	14.5636	0.705351	0.0337161	0.0400684	0.377718	0.0168581	0.101637	0.279013	16399
9035-GS-11	IPMK KO/ HIV-GFP-CA T200IVSVg	4419	3115	173	207	1756	68	442	1241	14.4698	0.704911	0.0391491	0.0468432	0.397375	0.0153881	0.100023	0.280833
9055-GS-0004	IPMK KO/ HIV-GFP-CA T200IVSVg	7887	5472	307	353	3020	145	807	2169	14.4097	0.6938	0.0389248	0.0447572	0.382909	0.0183847	0.10232	0.27501
9035-GS-14	IPMK KO/ HIV-GFP-CA P38AVSVg	171	93	7	7	43	3	14	54	15.1462	0.54386	0.0409357	0.0409357	0.251462	0.0175439	0.0818713	0.315789	1152
9035-GS-15	IPMK KO/ HIV-GFP-CA P38AVSVg	215	124	9	10	66	5	23	84	14.8047	0.576744	0.0418605	0.0465116	0.306977	0.0232558	0.106977	0.390698
9035-GS-16	IPMK KO/ HIV-GFP-CA P38AVSVg	766	413	34	45	194	7	89	270	15.4452	0.539164	0.0443864	0.0587467	0.253264	0.00913838	0.116188	0.35248
9055-GS-0001	IPMK KO/ HIV-GFP-CA P38A/T200IVSVg	6263	4834	224	280	1580	76	961	2669	19.1031	0.771835	0.0357656	0.044707	0.252275	0.0121348	0.153441	0.426154	21389
9055-GS-0002	IPMK KO/ HIV-GFP-CA P38A/T200IVSVg	6907	5380	252	335	1735	76	1063	2905	19.2027	0.77892	0.0364847	0.0485015	0.251194	0.0110033	0.153902	0.420588
9055-GS-0003	IPMK KO/ HIV-GFP-CA P38A/T200IVSVg	8219	6332	314	399	2211	87	1300	3472	19.2031	0.77041	0.0382042	0.0485461	0.269011	0.0105852	0.15817	0.422436
7845-GS-4	IPMK KO/ HIV-GFP-CA Q219AVSVg	253	163	21	25	68	5	33	103	16.8696	0.644269	0.083004	0.0988142	0.268775	0.0197628	0.130435	0.407115	1081
7845-GS-9	IPMK KO/ HIV-GFP-CA Q219AVSVg	381	213	12	26	126	5	30	111	13.4619	0.559055	0.0314961	0.0682415	0.330709	0.0131234	0.0787402	0.291339
7845-GS-14	IPMK KO/ HIV-GFP-CA Q219AVSVg	447	237	26	30	125	2	50	160	15.1633	0.530201	0.0581655	0.0671141	0.279642	0.00447427	0.111857	0.357942
9035-GS-12	IPMK KO/ HIV-GFP-CA T200I/Q219AVSVg	6507	4723	171	207	2532	101	634	1768	14.3756	0.725834	0.0262794	0.0318119	0.389119	0.0155217	0.0974335	0.271707	18893
9035-GS-13	IPMK KO/ HIV-GFP-CA T200I/Q219AVSVg	5187	3788	159	165	1999	77	483	1384	14.0422	0.730287	0.0306536	0.0318103	0.385387	0.0148448	0.0931174	0.266821
9035-GS-17	IPMK KO/ HIV-GFP-CA T200I/Q219AVSVg	7199	5219	191	217	3039	121	575	1771	13.5409	0.724962	0.0265315	0.0301431	0.422142	0.0168079	0.0798722	0.246006
Sample Name	Random integration control (RIC)	Unique integrations	# in genes	# +/- 2.5 kb TSS	# +/- 2.5 kb CpG	# +/- 2.5 kb LAD	# in LAD	# in SPAD	# +/- 2.5 kb SPAD	Genes/Mb	% in genes	% +/- 2.5 kb TSS	% +/- 2.5 kb CpG	% +/- 2.5 kb LAD	% in LAD	% in SPAD	% +/- 2.5 kb SPAD	Single condition (Total sites)
A	RIC	20905	9552	694	670	10870	442	615	2887	9.03899	0.456924	0.0331978	0.0320497	0.519971	0.0211433	0.0294188	0.138101	58831
B	RIC	21905	10226	828	878	10286	463	959	3801	9.91947	0.466834	0.0377996	0.0400822	0.469573	0.0211367	0.04378	0.173522
C	RIC	7146	3391	275	288	3334	146	329	1303	10.0542	0.474531	0.0384831	0.0403023	0.466555	0.020431	0.0460397	0.18234
D	RIC	8875	4145	327	364	4116	174	370	1518	9.95594	0.467042	0.0368451	0.0410141	0.463775	0.0196056	0.0416901	0.171042
Sample Name	HEK293T cell line, all HIV-1 WT virus	Unique integrations	# in genes	# +/- 2.5 kb TSS	# +/- 2.5 kb CpG	# +/- 2.5 kb LAD	# in LAD	# in SPAD	# +/- 2.5 kb SPAD	Genes/Mb	% in genes	% +/- 2.5 kb TSS	% +/- 2.5 kb CpG	% +/- 2.5 kb LAD	% in LAD	% in SPAD	% +/- 2.5 kb SPAD	Single condition (Total sites)
Sowd et al. PNAS. 2016.	HEK293T WT/ HIV-1-LucVSVg	23492	19324	1021	1521	4531	201	5449	12949	24.0535	0.822578	0.0434616	0.0647454	0.192874	0.0085561	0.231951	0.551209	49340
Sowd et al. PNAS. 2016.	HEK293T WT/ HIV-1-LucVSVg	11781	9841	501	738	2330	99	2699	6459	23.9117	0.835328	0.0425261	0.0626432	0.197776	0.00840336	0.229098	0.548256
Sowd et al. PNAS. 2016.	HEK293T WT/ HIV-1-LucVSVg	14067	11545	567	835	2770	119	3165	7549	23.7641	0.820715	0.0403071	0.0593588	0.196915	0.00845952	0.224995	0.536646
Sowd et al. PNAS. 2016.	HEK293T LKO/ HIV-1-LucVSVg	7259	4638	696	857	2043	100	989	2776	16.1668	0.638931	0.095881	0.11806	0.281444	0.013776	0.136245	0.382422	9673
Sowd et al. PNAS. 2016.	HEK293T LKO/ HIV-1-LucVSVg	2414	1519	233	271	743	30	306	891	16.2059	0.629246	0.0965203	0.112262	0.307788	0.0124275	0.126761	0.369097
Sowd et al. PNAS. 2016.	HEK293T CKO/ HIV-1-LucVSVg	30385	17657	544	341	18930	806	251	1618	7.18832	0.581109	0.0179036	0.0112226	0.623005	0.0265262	0.00826065	0.05325	62352
Sowd et al. PNAS. 2016.	HEK293T CKO/ HIV-1-LucVSVg	16416	9658	272	178	10368	443	150	900	7.13992	0.588328	0.0165692	0.0108431	0.631579	0.0269859	0.00913743	0.0548246
Sowd et al. PNAS. 2016.	HEK293T CKO/ HIV-1-LucVSVg	15551	9034	277	156	9889	432	142	828	7.10552	0.580927	0.0178124	0.0100315	0.635908	0.0277796	0.00913125	0.0532442
Sowd et al. PNAS. 2016.	HEK293T DKO/ HIV-1-LucVSVg	28846	14978	1423	1463	16352	729	783	3389	8.68224	0.51924	0.0493309	0.0507176	0.566872	0.0252721	0.0271441	0.117486	37622
Sowd et al. PNAS. 2016.	HEK293T DKO/ HIV-1-LucVSVg	8776	4554	457	468	5081	204	207	954	8.43152	0.518915	0.0520738	0.0533273	0.578965	0.0232452	0.0235871	0.108706
